# Supplementary material for: Association between dispensing of low-value oral albuterol and removal from Medicaid preferred drug lists
Source: BMC Health Serv Res. 2022 Apr 26;22:562. doi: 10.1186/s12913-022-07955-x (PMC9044602; doi:10.1186/s12913-022-07955-x)
Supplement: Supplementary file 2 — Additional file 2. [file 12913_2022_7955_MOESM2_ESM.xlsx]

## Sheet: nat_totals
National data about albuterol prescriptions, 2013-2019
Year	Inhaled	Syrup	Tablet	Tablet ER	total	oral_total	oral_pct	oral_total_scaled
2013	18055492	382256	26532	5484	18469764	414272	2.24297	414.272
2014	20018222	322757	22168	5333	20368480	350258	1.71961	350.258
2015	22045702	292785	18466	5401	22362354	316652	1.416	316.652
2016	23099751	246641	15528	5062	23366982	267231	1.14363	267.231
2017	23581406	216202	12846	4157	23814611	233205	0.979252	233.205
2018	22883675	165528	10736	3182	23063121	179446	0.778065	179.446
2019	15350441	99633	8382	265	15458721	108280	0.700446	108.28

## Sheet: arkansas and iowa raw data
Albuterol prescriptions in Arkansas and Iowa in 2010-2019
State	Quarter	Year	total_prescriptions	syrup_prescriptions	oral_prescriptions	perc_oral	perc_syrup
IA	1	2010	38623	822	1040	2.6927	2.12827
IA	2	2010	32547	380	671	2.06163	1.16754
IA	3	2010	31502	244	454	1.44118	0.774554
IA	4	2010	37473	441	656	1.75059	1.17685
IA	1	2011	38229	637	857	2.24175	1.66627
IA	2	2011	33179	281	436	1.31408	0.846921
IA	3	2011	31029	175	598	1.92723	0.563989
IA	4	2011	37549	438	617	1.64319	1.16648
IA	1	2012	37812	415	679	1.79573	1.09754
IA	2	2012	33030	187	484	1.46533	0.566152
IA	3	2012	34532	342	683	1.97788	0.990386
IA	4	2012	43027	413	635	1.47582	0.959862
IA	1	2013	37046	331	470	1.26869	0.893484
IA	2	2013	33720	206	322	0.954923	0.610913
IA	3	2013	35761	152	318	0.889237	0.425044
IA	4	2013	38632	254	384	0.993995	0.657486
IA	1	2014	41278	294	447	1.0829	0.712244
IA	2	2014	43580	200	347	0.796237	0.458926
IA	3	2014	48481	173	448	0.924073	0.356841
IA	4	2014	43820	246	551	1.25742	0.561387
IA	1	2015	53199	261	430	0.808286	0.490611
IA	2	2015	49173	145	200	0.406727	0.294877
IA	3	2015	48007	287	447	0.931114	0.597829
IA	4	2015	55416	167	238	0.429479	0.301357
IA	1	2016	55707	147	190	0.34107	0.263881
IA	2	2016	36149	151	338	0.935019	0.417716
IA	3	2016	35367	146	202	0.571154	0.412814
IA	4	2016	41595	208	263	0.632288	0.50006
IA	1	2017	35381	129	149	0.42113	0.364602
IA	2	2017	35828	171	208	0.580552	0.47728
IA	3	2017	34792	106	132	0.379398	0.304668
IA	4	2017	41309	106	151	0.365538	0.256603
IA	1	2018	36989	143	171	0.4623	0.386601
IA	2	2018	30881	80	124	0.401541	0.259059
IA	3	2018	33196	174	216	0.650681	0.52416
IA	4	2018	36326	123	160	0.440456	0.3386
IA	1	2019	33774	79	97	0.287203	0.233908
IA	2	2019	32533	93	109	0.335044	0.285864
IA	3	2019	31320	20	57	0.181992	0.063857
IA	4	2019	31138	60	115	0.369324	0.192691
AR	1	2010	42422	926	1225	2.88765	2.18283
AR	2	2010	35536	448	667	1.87697	1.26069
AR	3	2010	35975	269	492	1.36762	0.747741
AR	4	2010	40748	561	941	2.30932	1.37675
AR	1	2011	42532	734	920	2.16308	1.72576
AR	2	2011	35306	373	637	1.80423	1.05648
AR	3	2011	34473	199	505	1.46491	0.577263
AR	4	2011	42632	479	656	1.53875	1.12357
AR	1	2012	46254	683	997	2.15549	1.47663
AR	2	2012	35351	232	615	1.7397	0.656276
AR	3	2012	36180	220	445	1.22996	0.608071
AR	4	2012	45114	467	652	1.44523	1.03516
AR	1	2013	44746	518	676	1.51075	1.15765
AR	2	2013	37160	227	456	1.22713	0.610872
AR	3	2013	36408	157	331	0.909141	0.431224
AR	4	2013	43615	358	655	1.50178	0.820819
AR	1	2014	44858	348	542	1.20826	0.775781
AR	2	2014	40229	50	330	0.820304	0.124288
AR	3	2014	42436	86	283	0.666887	0.202658
AR	4	2014	49006	0	272	0.555034	0
AR	1	2015	46071	0	148	0.321243	0
AR	2	2015	42729	47	176	0.411898	0.109996
AR	3	2015	37782	0	143	0.378487	0
AR	4	2015	46140	27	203	0.439965	0.0585176
AR	1	2016	44437	12	42	0.0945158	0.0270045
AR	2	2016	35432	14	14	0.0395123	0.0395123
AR	3	2016	37435	0	0	0	0
AR	4	2016	43869	0	0	0	0
AR	1	2017	43775	19	43	0.0982296	0.0434038
AR	2	2017	39740	0	21	0.0528435	0
AR	3	2017	41918	0	0	0	0
AR	4	2017	47120	0	0	0	0
AR	1	2018	46075	0	0	0	0
AR	2	2018	40139	0	0	0	0
AR	3	2018	38377	0	0	0	0
AR	4	2018	44898	0	0	0	0
AR	1	2019	43583	0	0	0	0
AR	2	2019	37903	0	0	0	0
AR	3	2019	36170	0	17	0.0470003	0
AR	4	2019	42793	0	0	0	0
